# Supplementary material
Source: Elsevier journal article supplement (https://rcastoragev2.blob.core.windows.net/b9077568e1046d782baa7b2c86db04f6/mmc1.pdf)
Supplement: mmc1 [file mmc1.pdf]

## **Supplemental Information**

### **Osteopontin Expression Identifies a Subset of Recruited Macrophages Distinct from Kupffer Cells in the Fatty Liver**

Anneleen Remmerie, Liesbet Martens, Tinne Thoné, Angela Castoldi, Ruth Seurinck, Benjamin Pavie, Joris Roels, Bavo Vanneste, Sofie De Prijck, Mathias Vanhockerhout, Mushida Binte Abdul Latib, Lindsey Devisscher, Anne Hoorens, Johnny Bonnardel, Niels Vandamme, Anna Kremer, Peter Borghgraef, Hans Van Vlierberghe, Saskia Lippens, Edward Pearce, Yvan Saeys, and Charlotte L. Scott

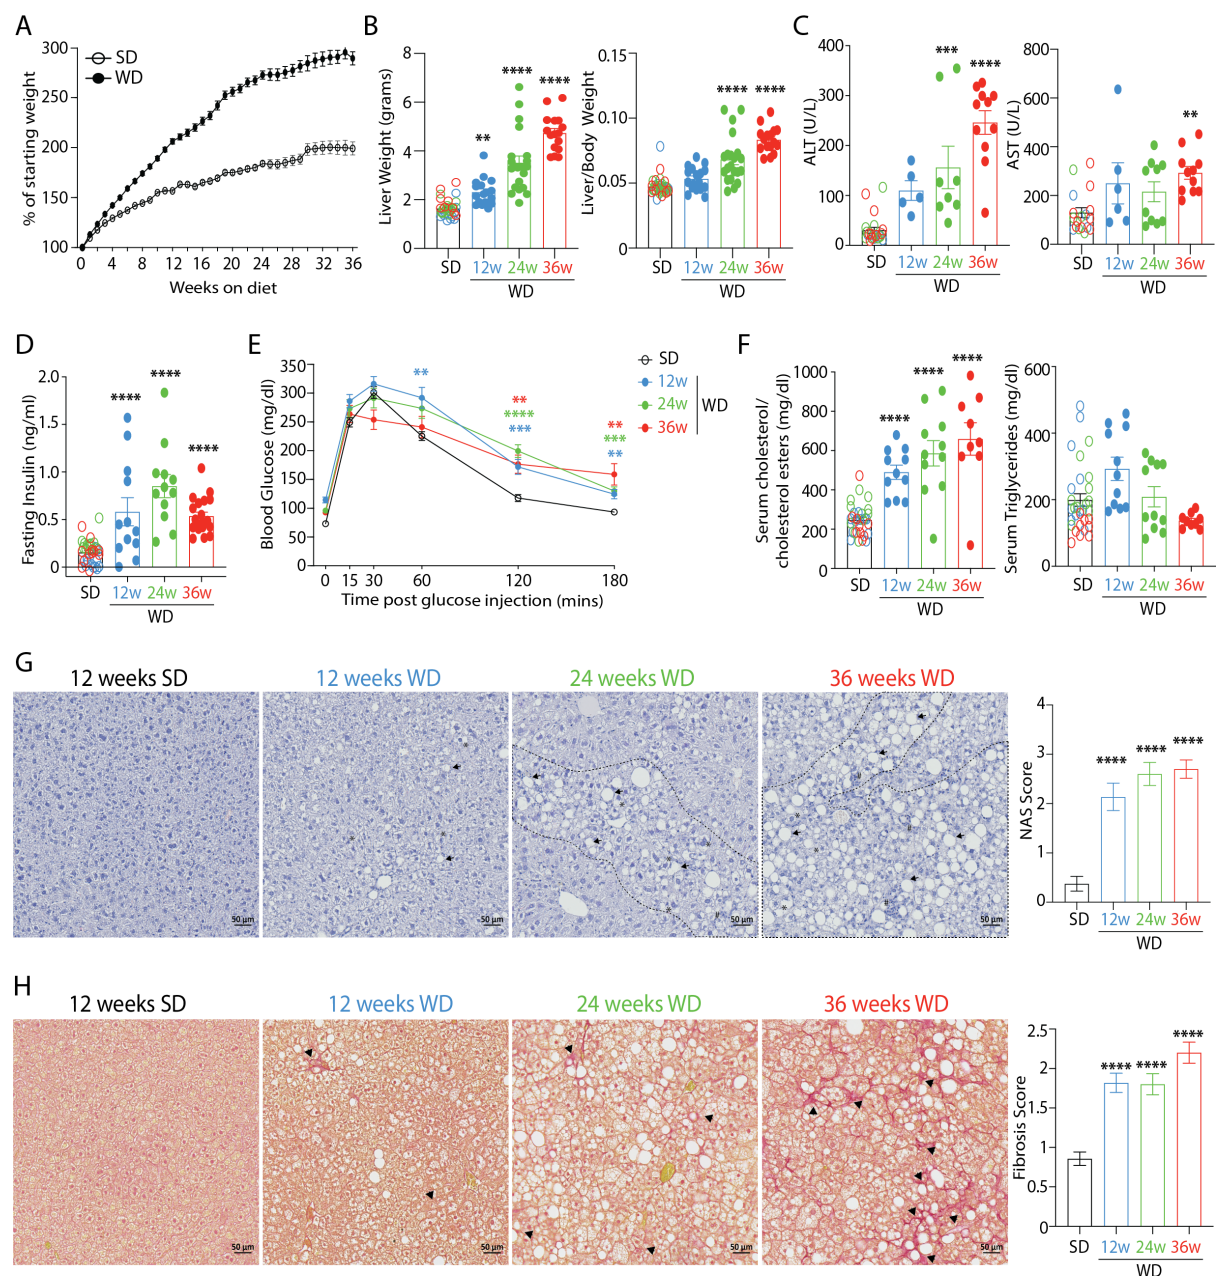

**Figure S1: Feeding mice a Western diet induces features of human MAFLD; related to Figure 1.**

C57BL/6 mice were fed either a standard diet (SD) or Western diet (WD) for 12, 24 or 36 weeks. (A) Body weights shown as a percentage of the starting weight of mice on the appropriate diet.  $n=11-37$  per timepoint. (B) Liver weight and liver-to-body weight ratio from mice fed the diets for 12 (blue), 24 (green) or 36 (red) weeks. Open circles show SD, closed circles show WD. Data are pooled from 2-4 independent experiments, with  $n=9-21$ . \*\*\*\* $p<0.0001$  One-way ANOVA compared with pooled SD. (C) Serum ALT and AST in mice on SD or WD at indicated time points. Data are pooled from 2 independent experiments with  $n=4-11$ . \*\* $p<0.01$ , \*\*\* $p<0.001$ , \*\*\*\* $p<0.0001$  One-way ANOVA compared with pooled SD. (D)

Insulin resistance was determined by measuring fasting insulin at the indicated time points on SD or WD. Data are pooled from 2 independent experiments with  $n=12-20$ . \*\*\*\* $p<0.0001$  One-way ANOVA compared with pooled SD. (E) Intraperitoneal glucose tolerance test in mice fed the SD (all times pooled - black, open circles) or WD for 12 (blue), 24 (green) or 36 (red) weeks. Data are pooled from 2 independent experiments with  $n=12-28$ . \*\* $p<0.01$ , \*\*\* $p<0.001$ , \*\*\*\* $p<0.0001$  Two-way ANOVA compared with pooled SD. (F) Serum cholesterol and cholesteryl esters (left) and serum triglycerides (right) measured in mice at indicated time points on SD or WD. Data are pooled from 2 independent experiments with  $n=9-11$ . \*\*\*\* $p<0.0001$  One-way ANOVA compared with pooled SD. (G,H) Histological appearance and scoring of livers as assessed by (G) H&E staining, with dashed lines indicating zones with more established steatosis (indicated with arrow), hepatocyte ballooning (indicated with \*) and inflammatory infiltrates (indicated with #). (H) Sirius Red staining, with arrow heads indicating fibrosis as assessed by deposition of collagen. Images are representative of 9-11 mice per timepoint per diet. NAS and fibrosis scores are calculated from each mouse. \*\*\*\* $p<0.0001$  One-way ANOVA compared with pooled SD. All error bars indicate  $\pm$ SEM.

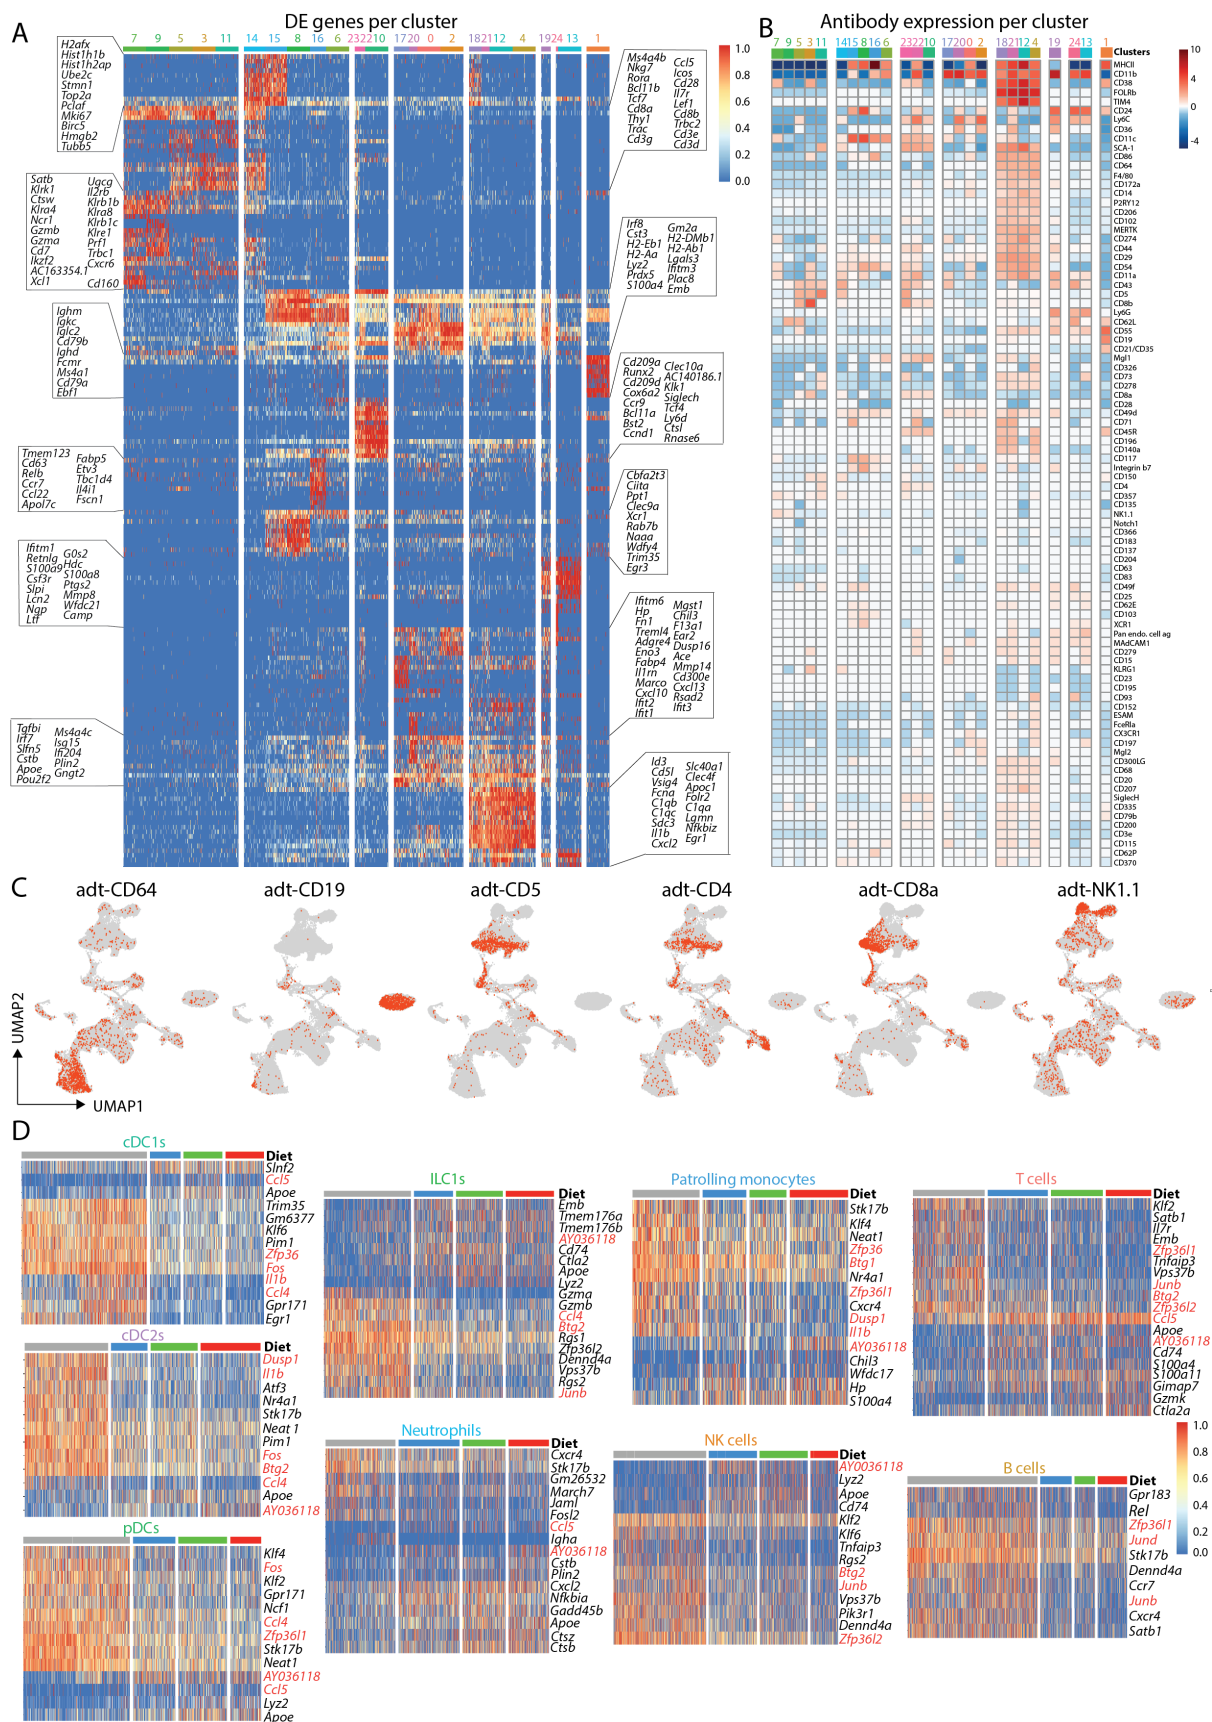



**Figure S2: Identification of distinct immune populations in MAFLD liver; related to Figure 1.**

Total live CD45<sup>+</sup> cells were sorted from livers of mice fed the SD or WD for 12, 24 or 36 weeks, (1 mouse per timepoint per diet) stained with total-seq A antibodies and loaded onto the 10X Chromium platform. After QC and exclusion of doublets, 56407 cells remained. (A) Heatmap showing top 10 distinguishing genes per cluster. (B) Marker Enrichment Modelling (MEM) heatmap showing enriched protein expression per cluster determined using CITE-seq after removal of antibodies with expression profiles similar to appropriate isotype controls. (C) UMAP showing expression of indicated proteins based on antibody mapping of each cluster. (D) Heatmaps showing top DEGs for the indicated cell types as assessed by comparing SD and WD samples pooled from all timepoints. Genes in red are DEGs conserved in multiple cell types.

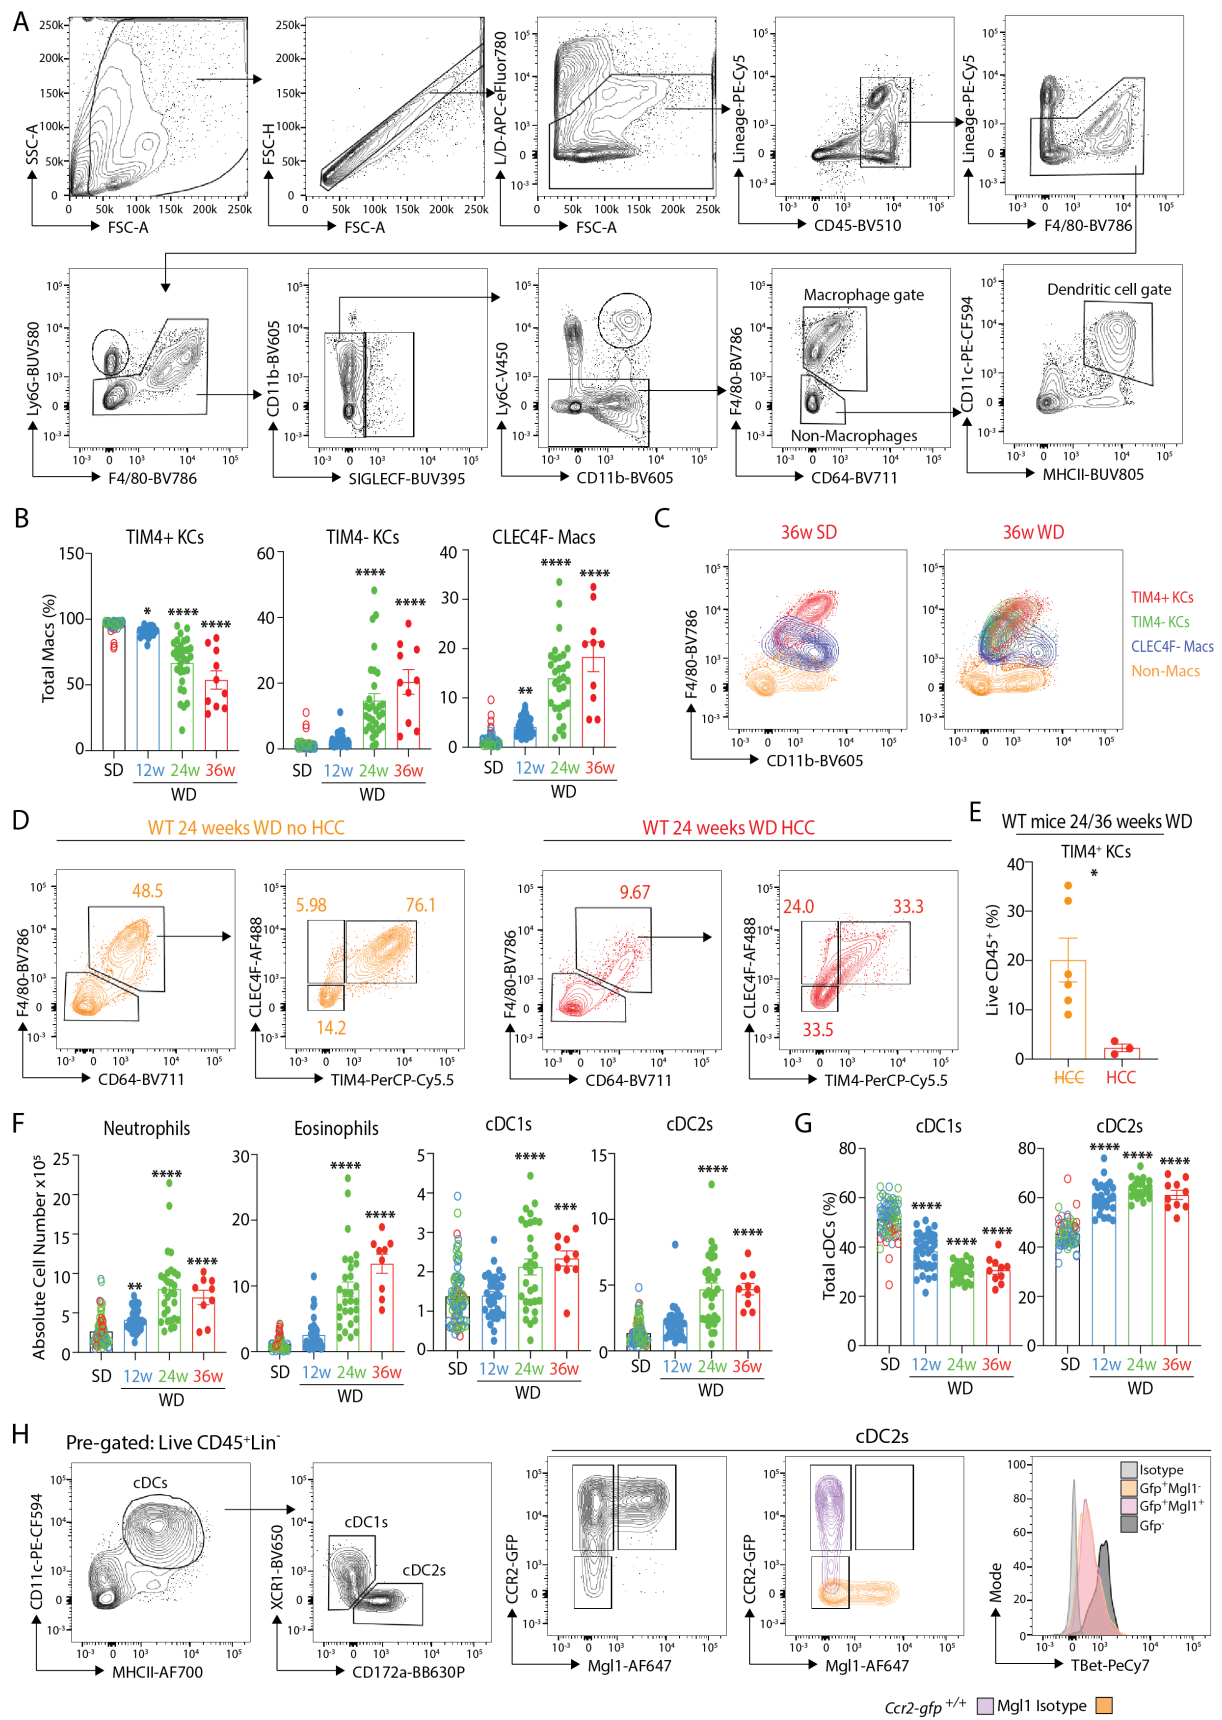

**Figure S3: Additional myeloid cells in MAFLD; related to Figure 2.**

(A) Flow cytometry gating strategy to identify indicated myeloid cell populations. (B) % of indicated macrophage populations amongst total macs at indicated timepoints on SD or WD. Data are pooled from 3-7 independent experiments with n=9-38. \*p<0.05, \*\*p<0.01, \*\*\*p<0.001, \*\*\*\*p<0.0001 One-way ANOVA compared with pooled SD as a control. (C) Expression of F4/80 and CD11b by indicated macrophage populations and non-macrophages as gated in A. (D) Flow plots from mice with (red) or without (orange) spontaneous development of HCC after 24 weeks on WD. Numbers represent % of parent population. (E) TIM4<sup>+</sup> ResKCs as a % of total Live CD45<sup>+</sup> cells in mice with (red) or without (orange) spontaneous development of HCC after 24 or 36 weeks on WD. Mice without HCC are taken from the same experiments as the mice where spontaneous HCC was observed. \*p<0.05 Student's t test. Data are pooled from 2 independent experiments with n=3-6. (F) Absolute cell numbers per liver of indicated cell types after 12 (blue), 24 (green) or 36 (red) weeks on diets as determined by flow cytometry. Open circles = SD, closed circles = WD. (G) % of cDC1s and cDC2s amongst total cDCs after different times on SD or WD. Data are pooled from 3-7 independent experiments with n=9-38. \*p<0.05, \*\*p<0.01, \*\*\*p<0.001, \*\*\*\*p<0.0001 One-way ANOVA compared with pooled SD as a control. (H) Flow cytometry gating showing heterogeneity of cDC2s based on expression of Mgl1, CCR2-GFP and Tbet in steady state *Ccr2-gfp*<sup>Tg/+</sup> mice. Data are representative of 3 mice. All error bars indicate ±SEM.

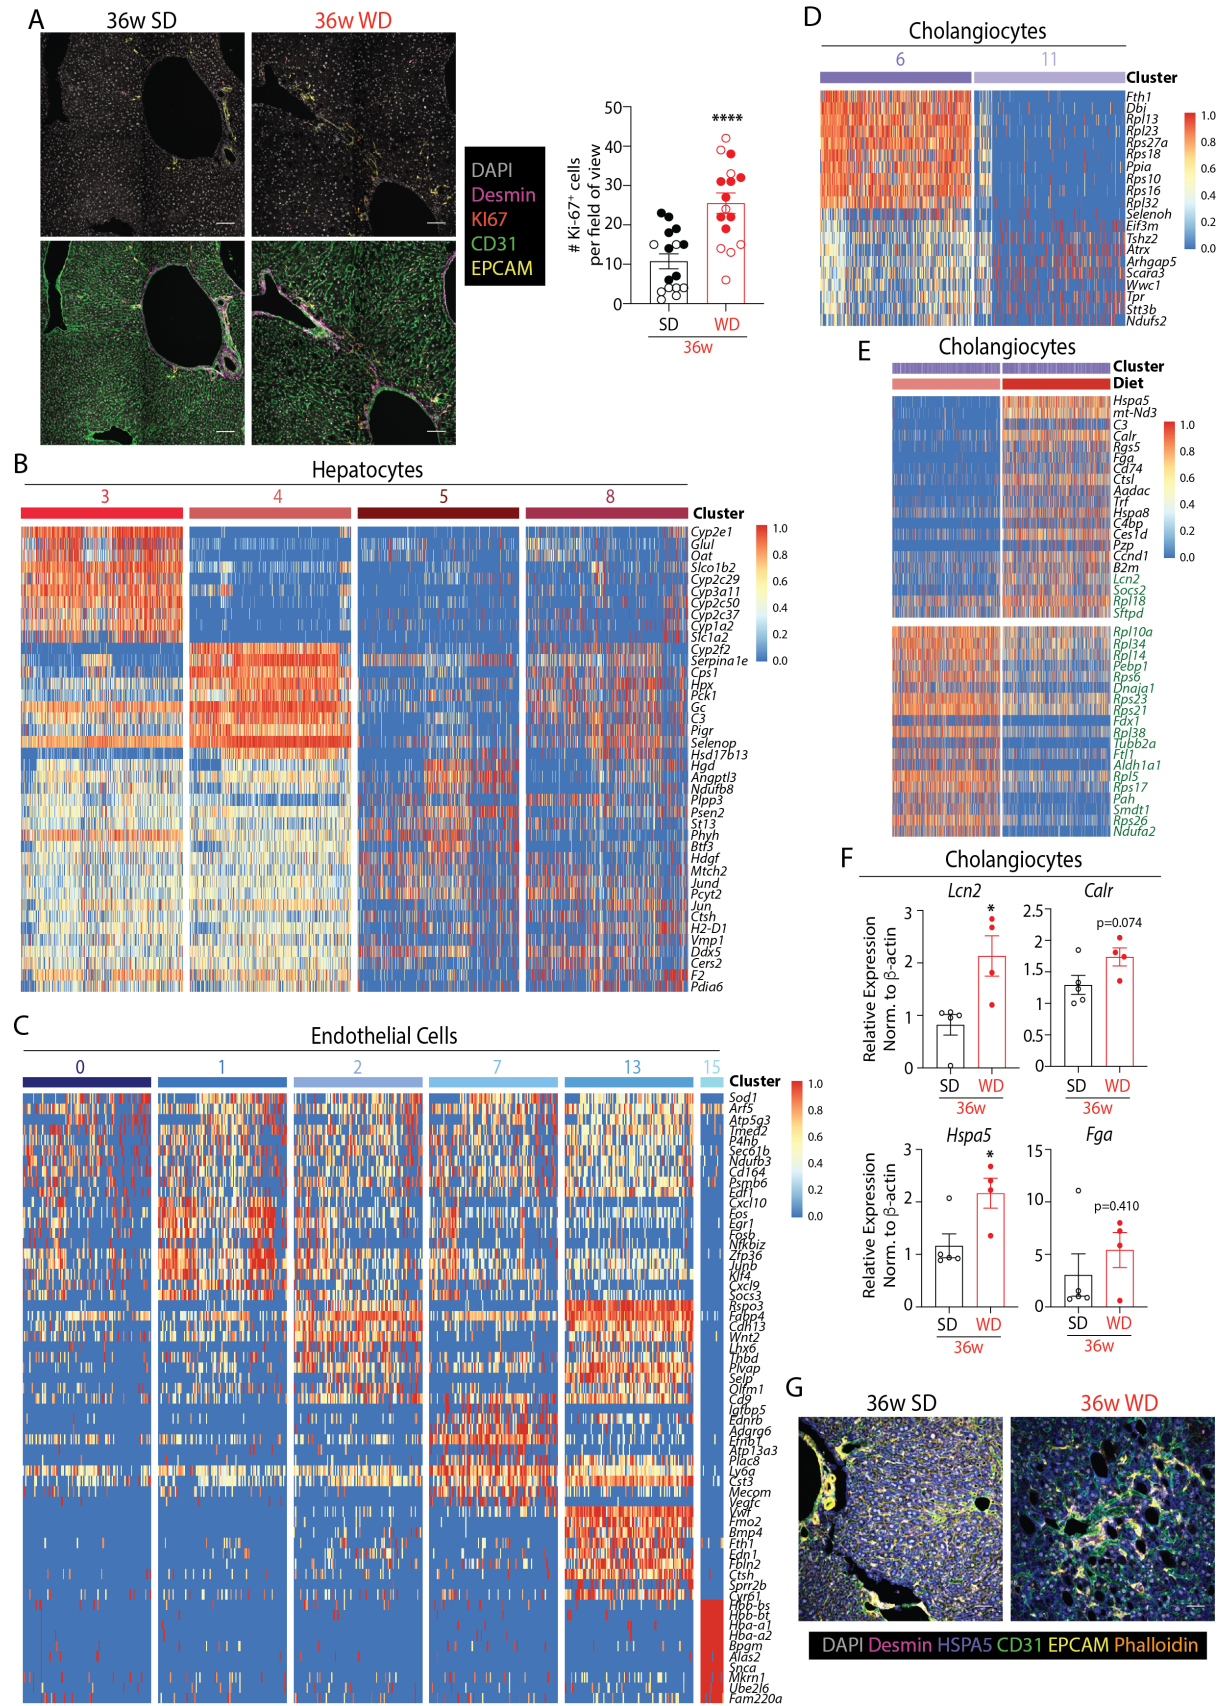

**Figure S4: CD45<sup>+</sup> cell responses in MAFLD; related to Figure 3.**

(A) Confocal microscopy images showing expression of DAPI (grey), Ki67 (red) and EPCAM (yellow) (top panel) and CD31 (green) and Desmin (magenta) (bottom panel) in livers of mice fed the SD or WD for 36 weeks. Scale bar is 100um. Images shown represent 4 fields of view. Number of Ki-67<sup>+</sup> cell per field of view quantified from 8 fields of view (from 3 different liver slices and stains) per mouse with 2 mice per diet. Different mice are shown in filled or empty circles. \*\*\*\* $p < 0.0001$  Student's t test. Error bars indicate  $\pm$ SEM. (B) Heatmaps showing top DEGs in between the different clusters of hepatocytes identified (SD and WD pooled). (C) Heatmaps showing top DEGs in between the different clusters of endothelial cells identified (SD and WD pooled). (D) Heatmaps showing top DEGs in between the different clusters of cholangiocytes identified (SD and WD pooled). (E) Heatmaps showing top 20 up- and down-regulated DEGs in cholangiocytes between SD and WD fed mice (24 and 36 weeks). Genes in green represent those DEGs specifically altered at the 36 week timepoint. (F) qPCR analysis for indicated genes in cholangiocytes. Data are from a single experiment with  $n=4-5$  per group. \* $p < 0.05$  Student's t test. Error bars indicate  $\pm$ SEM. (G) Confocal microscopy showing expression of HSPA5 (blue), DAPI (grey), Desmin (magenta), CD31 (green), EPCAM (yellow) and Phalloidin (orange) in a mouse fed the SD or WD for 36 weeks. Data are representative of 2 mice per diet.



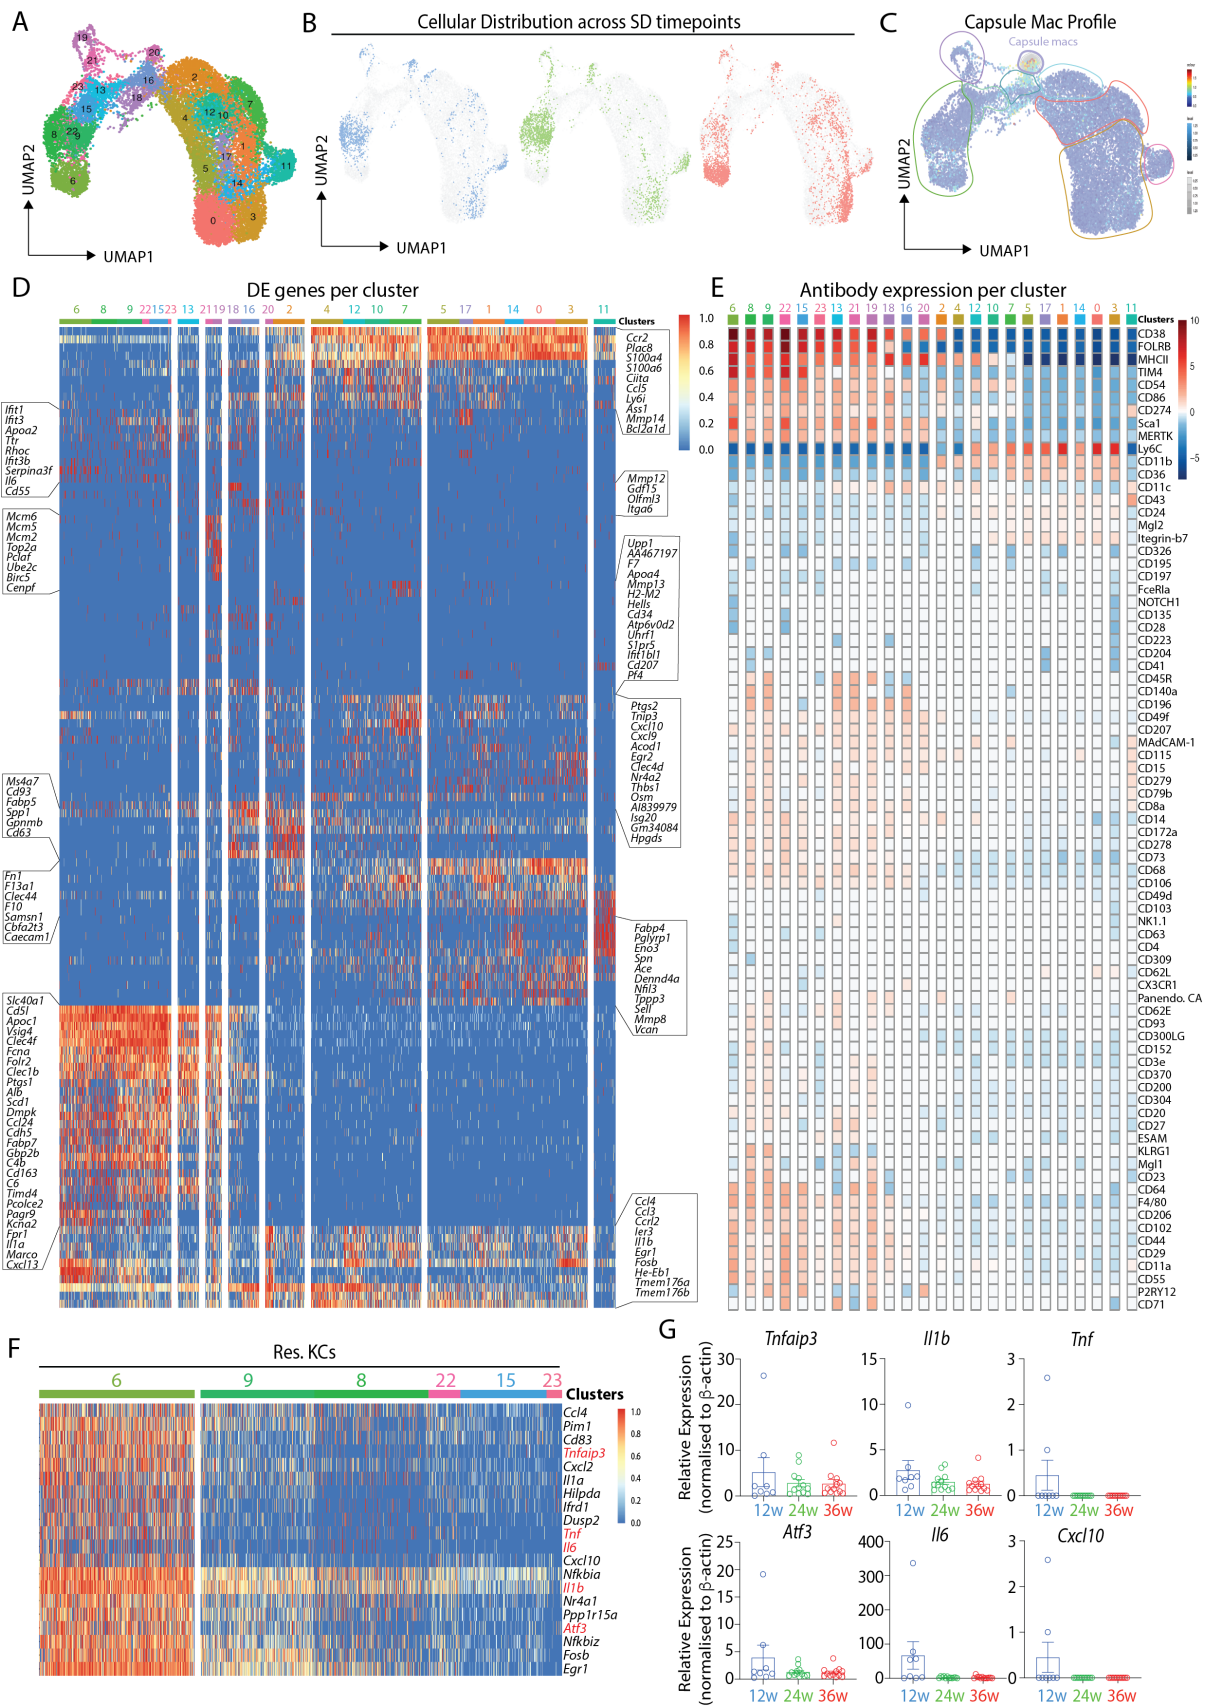

**Figure S5: Macrophage Heterogeneity in MAFLD; related to Figure 4.**

(A) UMAP showing all clusters identified amongst cells of monocyte and macrophage lineage pooled from SD and WD fed mice at 12, 24 and 36 weeks (1 mouse per timepoint). (B) Distribution of cells on SD at indicated timepoints. (C) The capsule macrophage signature (Sierro et al., 2017) was mapped onto the liver mac UMAP to identify cells with a similar profile using the Signature Finder algorithm (Pont et al., 2019). (D) Heatmap showing top 5 DEGs in each cluster from UMAP in Fig. S4A with all cells from all diets and timepoints pooled. (E) MEM heatmap showing enriched expression of indicated surface proteins per cluster identified in monocyte/macrophage UMAP (Fig. S4A). (F) Heatmap showing top 20 DEGs between cluster 6 and other ResKC clusters (9,8,22,15 and 23). (G) qPCR analysis for indicated genes on sorted ResKCs from mice fed the SD for 12,24 or 36 weeks. Data are pooled from 2 independent experiments with n=8-12. Error bars indicate  $\pm$ SEM.

A

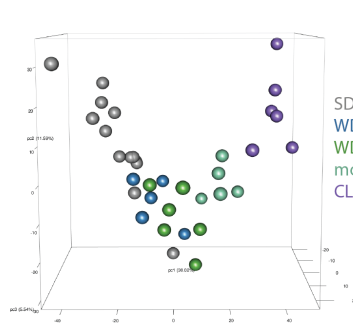

Bulk RNA Seq

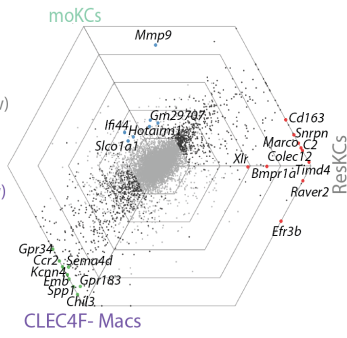

C

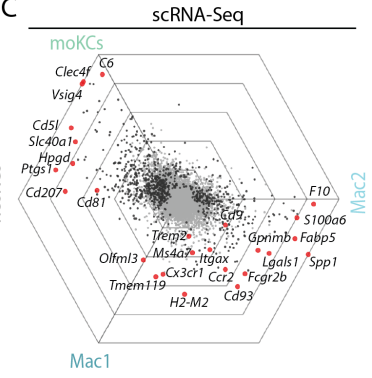

scRNA-Seq

B

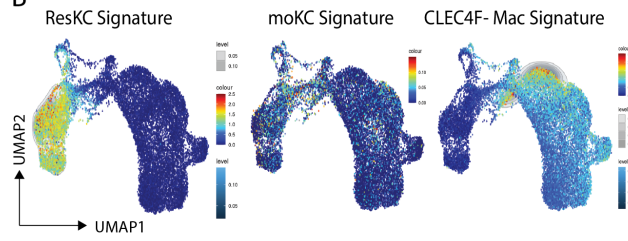

D

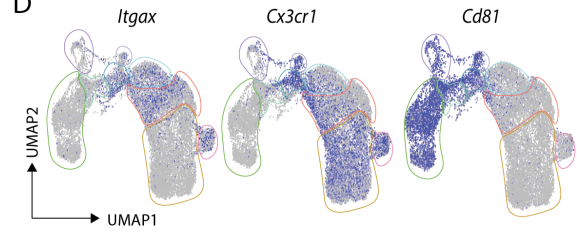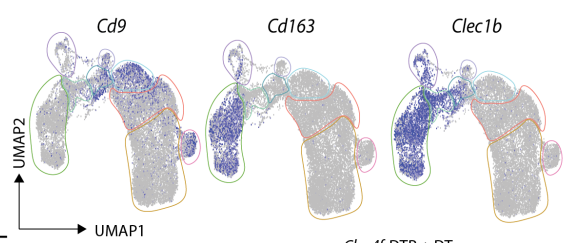

E

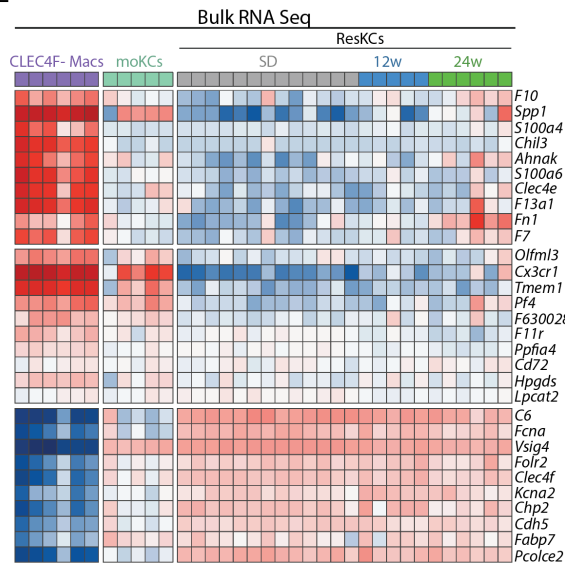

F

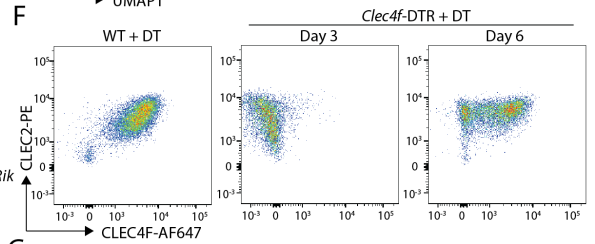

G

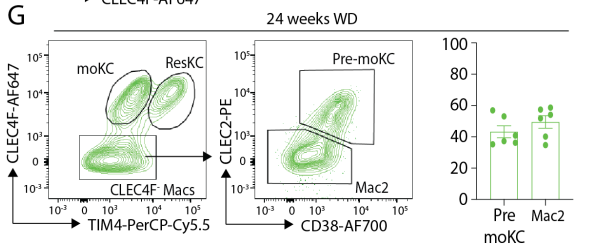

H

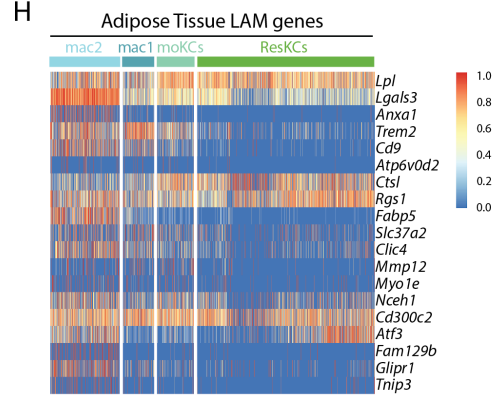

I Adipose Tissue vs Hepatic LAMs

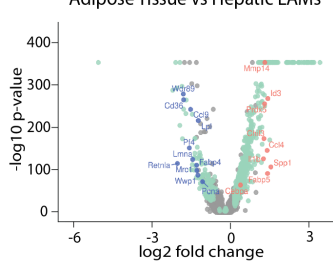

J Human SAM Signature A

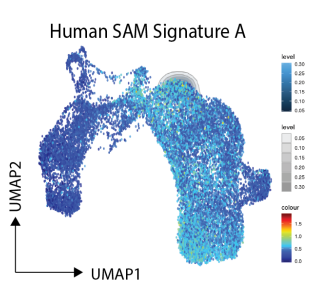

**Figure S6: Localization of hepatic LAMs in MAFLD; related to Figure 5.**

TIM4<sup>+</sup> ResKCs, TIM4<sup>-</sup> moKCs and CLEC4F<sup>-</sup> macs were sorted from mice (n=5/6 per population) fed the SD or WD for 12 (ResKCs only) or 24 weeks for Bulk RNA-seq analysis. (A) PCA plot of bulk RNA-seq data (left) and Triwise plot (right) showing DEGs between moKCs, ResKCs (SD and WD) and CLEC4F<sup>-</sup> macs from the 24 week timepoint. (B) The signature of each population used for the bulk analysis (from mice fed the WD for 24weeks) was mapped onto the liver mac UMAP to identify cells with a similar profile using the Signature Finder algorithm (Pont et al., 2019). (C) Triwise plot showing expression of DEGs from scRNA-seq analysis between the Mac1, Mac2 and moKC populations. (D) Expression of indicated genes by all monocytes and macrophages across diets and timepoints. (E) Heatmap showing top DEGs between Mac2, Mac1 and moKC populations from mice fed the WD for 24 and 36 weeks pooled (from scRNA-seq, see Fig. 5A) and their expression by the sorted populations in the bulk RNA-seq analysis. (F) *Clec4f*-DTR mice or WT littermate controls fed normal chow were given DT 3 or 6 days prior to analysis for expression of CLEC2 and CLEC4F expression. Data are representative of 2 experiments with n=4-6 per group. (G) *Nr1h3*<sup>fl/fl</sup> mice (no CRE; WT) were fed the WD for 24 weeks and CLEC4F, TIM4, CLEC2 and CD38 expression were examined. Left; flow cytometry plots. Right; % of total CLEC4F<sup>-</sup> macs expressing CLEC2 and CD38 (pre-moKCs) or lacking expression of both markers (Mac2). Data are from a single experiment with n=6. Error bars indicate  $\pm$ SEM. (H) Heatmap showing expression of top genes associated with adipose tissue LAMs (Jaitin et al., 2019) by the indicated macrophage populations. (I) Volcano plot showing differences between adipose tissue and hepatic LAMs. (J) Signature A of the Scar-associated macrophages in human fibrotic liver (Ramachandran et al., 2019) was mapped onto the liver mac UMAP to identify cells with a similar profile using the Signature Finder algorithm (Pont et al., 2019).

A

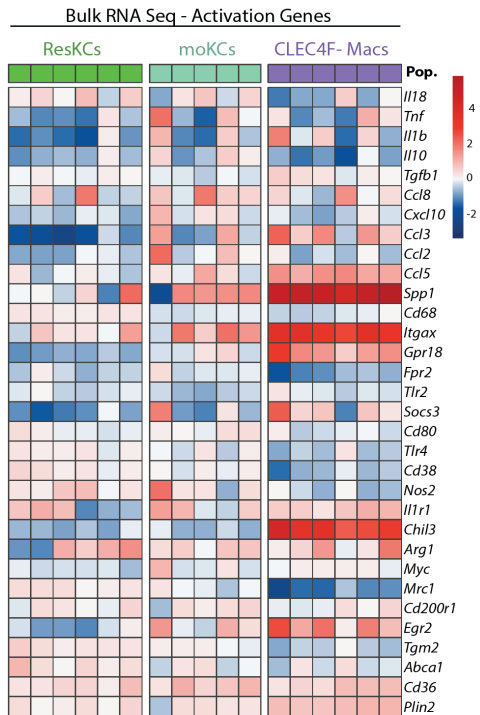

B

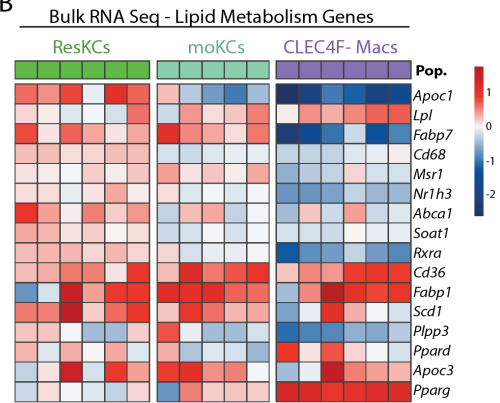

C

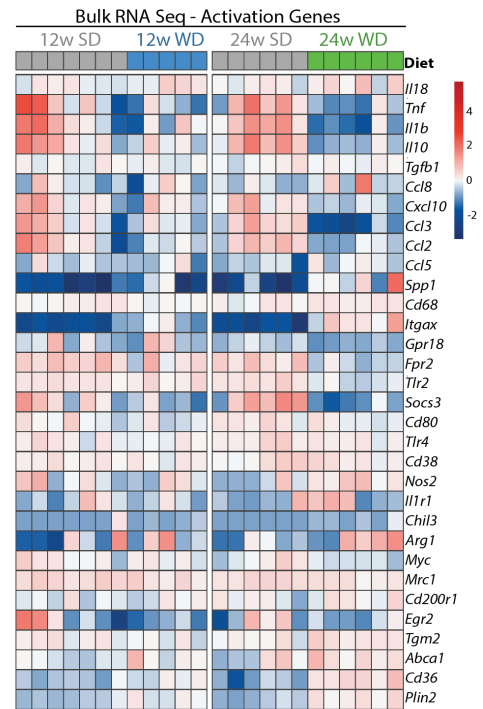

D

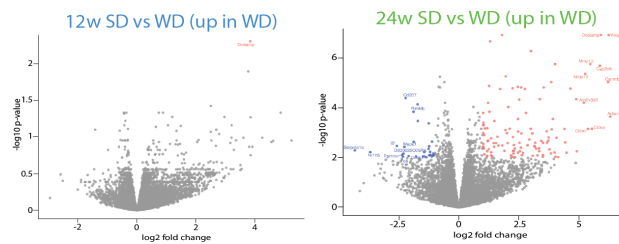

E

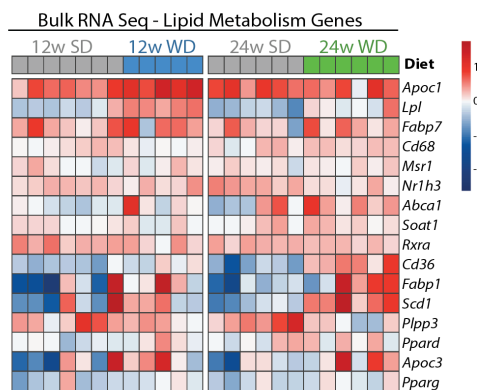

F

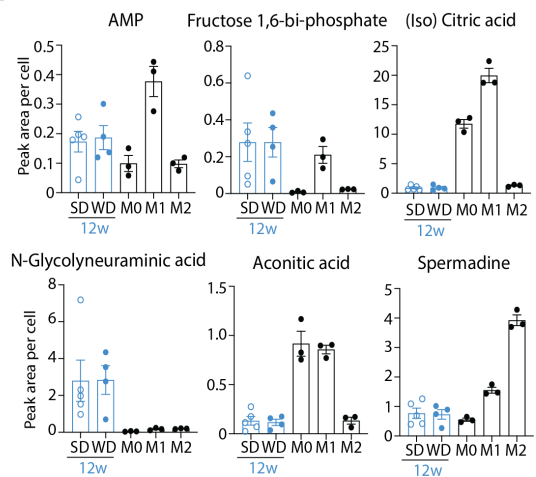

G

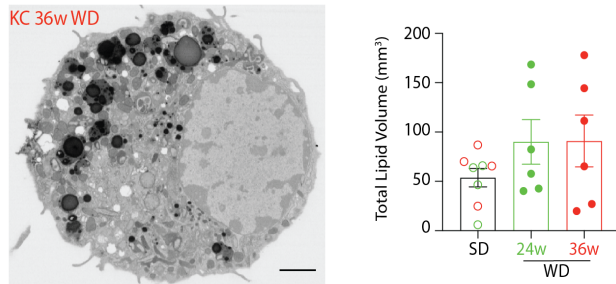



**Figure S7: Features of ResKCs in MAFLD; related to Figures 6 and 7.**

(A-C) Heatmaps showing expression (measured by bulk RNA-seq) of (A,C) prototypical immune activation genes or (B) lipid metabolism associated genes by ResKCs, moKCs and CLEC4F<sup>-</sup> macs from mice fed the WD for 24 weeks (A,B) or ResKCs from mice fed either the SD or WD for 12 or 24 weeks. (D) Volcano plot showing DEGs between ResKCs fed the SD and WD for either 12 (top) or 24 (bottom) weeks. (E) Heatmap showing expression of lipid metabolism associated genes by ResKCs from mice fed the SD or WD for 12 or 24 weeks as measured by bulk RNA-seq. (F) Generation of indicated metabolites by ResKCs isolated from the livers of mice fed a SD or WD for 12 weeks, and by *in vitro* polarized M0 or M1 and M2 BM-derived macrophages. Data are from a single experiment with n=3-5 per group. Error bars indicate  $\pm$ SEM. (G) CLEC4F<sup>+</sup> KCs were sorted from mice fed either the SD or the WD for 24 or 36 weeks and FIB-SEM imaging was performed. Left; image of a KC from a mouse fed the WD for 36 weeks. Right; total lipid volume (mm<sup>3</sup>) in CLEC4F<sup>+</sup> KCs as defined by machine learning from FIB-SEM images, each point represents a cell. 2-3 cells were imaged from 2 different mice per diet and timepoint. Error bars indicate  $\pm$ SEM.
